# Supplementary material for: Comparison of coated meshes for intraperitoneal placement in animal studies: a systematic review and meta-analysis
Source: Springer Nature journal article supplement (doi:10.1007/s10029-019-02071-y), 2019-10-28
Supplement: MOESM2 [file 17319142]

*Article Title:*

Comparison of coated meshes for intraperitoneal placement in animal studies, a systematic review and meta-analysis

*Journal name:*

Hernia: the journal of hernias and abdominal wall surgery

*Authors:*

Hong Liu, Sebastiaan van Steensel, Maurits-Jan Gielen, Timon Vercoulen, Jarno Melenhorst, Bjorn Winkens, Nicole D. Bouvy

*Correspondence:*

Address: Hong Liu

Department of General Surgery, Maastricht University Medical Centre

PO Box 5800, 6202 AZ, Maastricht, the Netherlands

E-mail: [h.liu@maastrichtuniversity.nl](mailto:h.liu@maastrichtuniversity.nl)

Table 3 The comparison between polypropylene mesh and HA/CMC coated PP mesh (PP mesh VS PP mesh + HA/CMC)

| Species              | Follow-up                                 | Comparison                                                                                                                                                                                                                                                                                                                                                                                     | Best mesh        | Measurements and reference                                                                                                                                                                                                                                                                                                                                                                |
|----------------------|-------------------------------------------|------------------------------------------------------------------------------------------------------------------------------------------------------------------------------------------------------------------------------------------------------------------------------------------------------------------------------------------------------------------------------------------------|------------------|-------------------------------------------------------------------------------------------------------------------------------------------------------------------------------------------------------------------------------------------------------------------------------------------------------------------------------------------------------------------------------------------|
|                      |                                           | (PP mesh VS PP mesh + HA/CMC)                                                                                                                                                                                                                                                                                                                                                                  |                  |                                                                                                                                                                                                                                                                                                                                                                                           |
| Rat                  | Several time points together till 4 weeks | Surgipromesh (AutoSuture) VS PP mesh + CMC [1];<br>PP mesh VS Sepramesh (Genzyme) [2]                                                                                                                                                                                                                                                                                                          | PP mesh + HA/CMC | Extent score of adhesion [1];<br>Rate of adhesion presence [2];<br>Percentage of adhesion-area [2]                                                                                                                                                                                                                                                                                        |
| Rat                  | 1 week                                    | Prolene (Ethicon) VS PP mesh + HA [3];<br>Prolene (Ethicon) VS Sepramesh (Genzyme) [4,5];<br>Marlex (Bard) VS PP mesh + Seprafilm (Genzyme) [6]                                                                                                                                                                                                                                                | PP mesh + HA/CMC | Tenacity score of adhesion [3];<br>Numbers of rats with bowel adhesion [5];<br>Percentage of adhesion-area [5,4,6]                                                                                                                                                                                                                                                                        |
| Rat<br>Rabbits       | 2 weeks                                   | PP mesh VS PP mesh + Seprafilm (Genzyme) [7];<br>PP mesh VS PP mesh + Sepracoat (Genzyme) [8];<br>Marlex (Bard) VS Sepramesh (Genzyme) [9];<br>Marlex( Bard) VS PP mesh + Seprafilm (Genzyme) [6]                                                                                                                                                                                              | PP mesh + HA/CMC | Percentage of adhesion-area [7] (rat), [8,9] (rabbit), [6] (rat);<br>Adhesion score composed of type and tenacity [9] (rabbit)                                                                                                                                                                                                                                                            |
| Rat                  | 3 weeks                                   | PP mesh VS PP mesh + Seprafilm (Genzyme)                                                                                                                                                                                                                                                                                                                                                       | PP mesh + HA/CMC | Percentage of adhesion-area [10]                                                                                                                                                                                                                                                                                                                                                          |
| Rat                  | 3 weeks                                   | Parietene (Sofradim) VS Sepramesh (Genzyme)                                                                                                                                                                                                                                                                                                                                                    | No preference    | Adhesion-area [11];<br>Rate of adhesion presence [11]                                                                                                                                                                                                                                                                                                                                     |
| Rat<br>Rabbit<br>Pig | 4 weeks                                   | PP mesh VS Sepramesh (Genzyme) [12];<br>Prolene(Ethicon) VS Sepramesh (Genzyme) [4,5];<br>Marlex (Bard) VS Seprafilm (Genzyme) [6];<br>Heavy PP mesh VS PP mesh + HA/CMC gel [13];<br>PP mesh (Davol) VS Sepramesh (Genzyme) [14];<br>PP mesh VS PP mesh + Seprafilm (Genzyme) [15];<br>Prolene (Ethicon) VS Sepramesh (Genzyme) [16,17];<br>Surgipro (AutoSuture) VS Sepramesh (Genzyme) [18] | PP mesh + HA/CMC | Percentage of adhesion-area [12] (pig), [4,6,5,13] (rat), [14,15] (rabbit);<br>Tenacity score of adhesion [16-18] (rat);<br>Extent score of adhesion [17,18,13] (rat), [14] (rabbit);<br>Severity score of adhesion [14] (rabbit), [13] (rat);<br>Density score of adhesion [13] (rat);<br>Rate of adhesion presence [14] (rabbit);<br>Adhesion numbers from organs to mesh [15] (rabbit) |
| Rat                  | 4 weeks                                   | Prolene (Ethicon) VS PP mesh + SMC                                                                                                                                                                                                                                                                                                                                                             | PP mesh + SMC    | Extent score of adhesion [19]                                                                                                                                                                                                                                                                                                                                                             |
| Rat<br>Pig           | 6 weeks                                   | Surgipro VS Seprafilm (Genzyme) [20];<br>Premilene(Braun) VS PP mesh + Seprafilm (Genzyme) [21];<br>PP mesh VS PP mesh + Seprafilm (Genzyme) [10]                                                                                                                                                                                                                                              | PP mesh + HA/CMC | Percentage of adhesion-area [20] (pig), [10] (rat);<br>Rate of adhesion presence [21] (rat)                                                                                                                                                                                                                                                                                               |
| Rat                  | 8 weeks                                   | Prolene (Ethicon) VS Sepramesh (Genzyme) [22];<br>PP mesh VS Seprafilm (Genzyme) [23]                                                                                                                                                                                                                                                                                                          | PP mesh + HA/CMC | Percentage of adhesion-area [22];<br>Adhesion score composed of type and tenacity [22];<br>Adhesion score composed of extent and tenacity [23];<br>Number of rats with severity score of adhesion 3-4 [22]                                                                                                                                                                                |
| Rat                  | 3 months                                  | Parietene (Covidien) VS Sepramesh (Bard)                                                                                                                                                                                                                                                                                                                                                       | PP mesh + HA/CMC | Percentage of adhesion-area [24];<br>Adhesion score composed of extent, type and tenacity [24]                                                                                                                                                                                                                                                                                            |
| Rabbit               | 4 months                                  | ProLite Ultra mesh VS Sepramesh (Bard)                                                                                                                                                                                                                                                                                                                                                         | PP mesh + HA/CMC | Percentage of adhesion-area [25];<br>Tenacity score of adhesion [25]                                                                                                                                                                                                                                                                                                                      |

Table 4 The comparison between PP mesh and Parietex Composite mesh (PP mesh VS Polyester mesh + collagen)

| Species | Follow-up | Comparison                                                                                                                                                                                  | Best mesh                 | Measurements and reference                                                                                                                                                                                                          |
|---------|-----------|---------------------------------------------------------------------------------------------------------------------------------------------------------------------------------------------|---------------------------|-------------------------------------------------------------------------------------------------------------------------------------------------------------------------------------------------------------------------------------|
|         |           | (PP mesh VS Polyester mesh + collagen)                                                                                                                                                      |                           |                                                                                                                                                                                                                                     |
| Rat     | 1 week    | Prolene (Ethicon) VS Parietex Composite (Sofradim)                                                                                                                                          | No preference             | Percentage of adhesion-area [5]                                                                                                                                                                                                     |
| Rat     | 1 week    | Prolene (Ethicon) VS Parietex Composite (Sofradim)<br>[4,26,5]                                                                                                                              | Polyester mesh + collagen | Numbers of rats with bowel adhesion [5];<br>Percentage of adhesion-area [4,26];<br>Adhesion score composed of extent, type and tenacity [26]                                                                                        |
| Rabbit  | 2 weeks   | Surgipro (Tyco) VS Parietex Composite (Sofradim) [27];<br>Prolene (Ethicon) VS Parietex Composite (Sofradim) [28]                                                                           | Polyester mesh + collagen | Percentage of adhesion-area [27];<br>Adhesion-area [28]                                                                                                                                                                             |
| Rat     | 3 weeks   | Parietene (Sofradim) VS Parietex Composite (Sofradim)<br>[11];<br>Marlex VS Parietex Composite [29]                                                                                         | Polyester mesh + collagen | Percentage of adhesion-area [11,29];<br>Rate of adhesion presence [11];<br>Tensile strength of adhesion [29]                                                                                                                        |
| Rat     | 4 weeks   | Prolene (Ethicon) VS Parietex Composite [5]                                                                                                                                                 | PP mesh                   | Percentage of adhesion-area [5]                                                                                                                                                                                                     |
| Rat     | 4 weeks   | Marlex VS Parietex Composite [30];<br>Prolene (Ethicon) VS Parietex Composite (Covidien) [31]                                                                                               | No preference             | Percentage of adhesion-area [30,31];<br>Extent score of adhesion [31];<br>Tenacity score of adhesion [31]                                                                                                                           |
| Rat     | 4 weeks   | Prolene (Ethicon) VS Parietex Composite (Sofradim)<br>[4,26];<br>Prolene (Ethicon) VS Parietex Composite (Covidien) [32];<br>Surgipro (AutoSuture) VS Parietex Composite (Sofradim)<br>[18] | Polyester mesh + collagen | Percentage of adhesion-area [4,32,26];<br>Extent score of adhesion [18];<br>Tenacity score of adhesion [18];<br>Adhesion score composed of extent, type and tenacity [26];<br>Adhesion score composed of tenacity and severity [32] |
| Rat     | 3 months  | Prolene (Ethicon) VS Parietex Composite (Covidien) [32];<br>Parietene (Covidien) VS Parietex Composite (Covidien)<br>[24]                                                                   | Polyester mesh + collagen | Adhesion score composed of tenacity and severity [32];<br>Percentage of adhesion-area [32];<br>Adhesion score composed of extent, type and tenacity [24]                                                                            |
| Rabbit  | 4 months  | ProLite Ultra VS Parietex Composite (Covidien)                                                                                                                                              | No preference             | Tenacity score of adhesion [25];<br>Percentage of adhesion-area [25]                                                                                                                                                                |

Table 5 The comparison between PP mesh and Parietene Composite mesh (PP mesh VS PP mesh + collagen)

| Species | Follow-up | Comparison                                             | Best mesh          | Measurements and reference                                                                     |
|---------|-----------|--------------------------------------------------------|--------------------|------------------------------------------------------------------------------------------------|
|         |           | (PP mesh VS PP mesh + collagen)                        |                    |                                                                                                |
| Rat     | 1 week    | Prolene (Ethicon) VS coated Parieten (Sofradim)        | No preference      | Rate of adhesion presence [33];<br>Number of rats with bowel adhesion [33]                     |
| Rat     | 3 weeks   | Parietene (Sofradim) VS Parietene Composite (Sofradim) | PP mesh + collagen | Rate of adhesion presence [11];<br>Percentage of adhesion-area [11]                            |
| Rat     | 4 weeks   | Prolene (Ethicon) VS coated Parieten (Sofradim)        | PP mesh + collagen | Rate of adhesion presence [33]                                                                 |
| Rat     | 4 weeks   | Prolene (Ethicon) VS coated Parieten (Sofradim)        | No preference      | Number of rats with bowel adhesion [33]                                                        |
| Rat     | 2 months  | Prolene (Ethicon) VS Parietene Composite (Sofradim)    | No preference      | Percentage of adhesion-area [22];<br>Severity score of adhesion [22]                           |
| Rat     | 2 months  | Prolene (Ethicon) VS Parietene Composite (Sofradim)    | PP mesh + collagen | Number of rats with severity score of adhesion 3-4 [22]                                        |
| Rat     | 3 months  | Parietene (Covidien) VS Parietene Composite (Covidien) | PP mesh + collagen | Percentage of adhesion-area [24];<br>Adhesion score composed of extent, type and tenacity [24] |

Table 6 The comparison between PP mesh and PP mesh coated by polyurethane (PP mesh VS PP mesh + PU)

| Species | Follow-up                                     | Comparison                               | Best mesh     | Measurements and reference                                        |
|---------|-----------------------------------------------|------------------------------------------|---------------|-------------------------------------------------------------------|
|         |                                               | (PP mesh VS PP mesh + PU)                |               |                                                                   |
| Rat     | 2 weeks                                       | Marlex (Bard) VS PP mesh + PU            | No preference | Percentage of adhesion-area [34]                                  |
| Rabbit  | 2 weeks                                       | PP mesh VS PP mesh + PU                  | PP mesh + PU  | Adhesion-area [35]                                                |
| Rat     | 2 weeks                                       | Marlex (Bard) VS PP mesh + PU [34];      | PP mesh + PU  | Severity score of adhesion (≥moderate) [34];                      |
| Rabbit  |                                               | Surgipro (Tyco) VS PP mesh + PU [27]     |               | Percentage of adhesion-area [27]                                  |
| Rat     | 3 weeks,<br>3 months,<br>6 months<br>together | Prolene (Ethicon) VS Combi (Angiologica) | PP mesh + PU  | Extent score of adhesion [36];<br>Tenacity score of adhesion [36] |

Table 7 The comparison between PP mesh and PP-polydioxanone mesh coated by oxidized regenerated cellulose (PP mesh VS PP mesh + ORC)

| Species | Follow-up                      | Comparison<br>(PP mesh VS PP mesh + ORC)                                 | Best mesh     | Measurements and reference                                                                                                                      |
|---------|--------------------------------|--------------------------------------------------------------------------|---------------|-------------------------------------------------------------------------------------------------------------------------------------------------|
| Rat     | 1 week,<br>4 weeks<br>together | Surgipromesh (AutoSuture) VS PP mesh + Interceed TC7 (Johnson & Johnson) | PP mesh + ORC | Extent score of adhesion [1]                                                                                                                    |
| Rat     | 1 week                         | Prolene (Ethicon) VS coated Proceed (Ethicon) [37,26]                    | PP mesh + ORC | Percentage of adhesion-area [26];<br>Adhesion score composed of extent, type and tenacity [26,37]                                               |
| Rat     | 1 week                         | Prolene (Ethicon) VS coated Proceed (Ethicon)                            | No preference | Percentage of adhesion-area [4]                                                                                                                 |
| Rat     | 2 weeks                        | Bard Mesh (Bard) VS PP mesh + Interceed TC7 (Ethicon)                    | PP mesh + ORC | Scale score of adhesion [38];<br>Percentage of adhesion-area [38]                                                                               |
| Rat     | 4 weeks                        | Prolene (Ethicon) VS Proceed (Ethicon) [4,37,26]                         | No preference | Percentage of adhesion-area [4,26];<br>Tenacity and extent score of adhesion [37];<br>Adhesion score composed of extent, type and tenacity [26] |
| Rat     | 4 weeks                        | Prolene (Ethicon) VS PP mesh + Interceed (Johnson & Johnson)             | PP mesh + ORC | Extent score of adhesion [17];<br>Tenacity score of adhesion [17]                                                                               |
| Pig     | 6 weeks                        | Prolene (Ethicon) VS PP mesh + Interceed (Johnson & Johnson)             | PP mesh + ORC | Percentage of adhesion-area [39]                                                                                                                |
| Pig     | 6 weeks                        | Prolene (Ethicon) VS PP mesh + Interceed (Johnson & Johnson)             | No preference | Percentage of adhesion-area in laparoscopy [39];<br>Tenacity score of adhesion in laparoscopy [39]                                              |
| Rabbit  | 8 weeks                        | PREMILENE (B. Braun) VS Proceed (Johnson & Johnson)                      | PP mesh + ORC | Extent score of adhesion [40]                                                                                                                   |
| Rabbit  | 8 weeks                        | PREMILENE (B. Braun) VS Proceed (Johnson & Johnson)                      | No preference | Adhesion size [40];<br>Adhesion separate strength [40];<br>Adhesion score composed of extent, size and strength to separate from mesh [40]      |
| Rat     | 3 months                       | Marlex (Bard) VS Proceed (Ethicon)                                       | No preference | Adhesion score composed of extent and tenacity [41]                                                                                             |
| Rabbit  | 4 months                       | ProLite Ultra mesh VS Proceed (Ethicon)                                  | No preference | Adhesion score of tenacity [25];<br>Percentage of adhesion-area [25]                                                                            |
| Pig     | 7 months                       | Prolene (Ethicon) VS Proceed (Ethicon)                                   | No preference | Percentage of adhesion-area in laparoscopy [39];<br>Tenacity score of adhesion in laparoscopy [39]                                              |
| Rabbit  | 1 year                         | Marlex (Bard) VS Proceed (Ethicon)                                       | PP mesh + ORC | Percentage of adhesion-area [42]                                                                                                                |

Table 8 The comparison between PP mesh and polyglactin coated PP mesh (PP mesh VS PP mesh + polyglactin)

| Species | Follow-up | Comparison                                                                                                                     | Best mesh             | Measurements and reference                                                                            |
|---------|-----------|--------------------------------------------------------------------------------------------------------------------------------|-----------------------|-------------------------------------------------------------------------------------------------------|
|         |           | (PP mesh VS PP mesh + polyglactin)                                                                                             |                       |                                                                                                       |
| Rabbit  | 2 weeks   | Marlex(Bard) VS Marlex (Bard) + Vicryl (Ethicon)                                                                               | PP mesh + polyglactin | Percentage of adhesion-area [9];<br>Adhesion score composed of type and tenacity [9]                  |
| Rat     | 2 weeks   | Parietene (Tyco) VS Vyproll (Ethicon);<br>Optilene (B/Braun) VS Vyproll (Ethicon)                                              | No preference         | Percentage of adhesion-area [43]                                                                      |
| Rat     | 4 weeks   | Prolene (Ethicon) VS Prolene (Ethicon) + Vicryl (Ethicon)                                                                      | No preference         | Tenacity score of adhesion [44] (rat);                                                                |
| Rabbit  |           | [44];<br>Prolene (Ethicon) VS Vyproll (Ethicon) [45]                                                                           |                       | Rate of adhesion presence [45] (rabbit);<br>Adhesion score of tenacity and type [45] (rabbit)         |
| Rat     | 4 weeks   | Surgipro mesh (AutoSuture) VS Vypro II (Johnson & Johnson)                                                                     | PP mesh + polyglactin | Extent score of adhesion [18];<br>Tenacity score of adhesion [18];<br>Breaking force of adhesion [18] |
| Rat     | 2 months  | Prolene (Ethicon) VS Prolene (Ethicon) + Vicryl (Ethicon)                                                                      | No preference         | Extent score of adhesion [46] (pig);                                                                  |
| Pig     |           | [44];<br>Marlex (Bard) VS Marlex (Bard) + Vicryl (Ethicon) [46];<br>Softmesh (Bard) VS Softmesh (Bard) + Vicryl (Ethicon) [46] |                       | Tenacity score of adhesion [44] (rat), [46] (pig)                                                     |
| Rabbit  | 3 months  | PP mesh VS PP mesh + polyglactin                                                                                               | PP mesh + polyglactin | Percentage of adhesion-area [43]                                                                      |

Table 9 The comparison between PP mesh and PP mesh covered by expanded polytetrafluoroethylene (PP mesh VS PP mesh + ePTFE)

| Species | Follow-up                            | Comparison<br>(PP mesh VS PP mesh +ePTFE)                                                                                                                         | Best mesh       | Measurements and reference                                                             |
|---------|--------------------------------------|-------------------------------------------------------------------------------------------------------------------------------------------------------------------|-----------------|----------------------------------------------------------------------------------------|
| Rat     | 3 weeks, 3 months, 6 months together | Prolene (Ethicon) VS Bard Composix (Bard)                                                                                                                         | PP mesh + ePTFE | Extent score of adhesion [36];<br>Tenacity score of adhesion [36]                      |
| Rat     | 2 weeks                              | Surgipro (Tyco) VS Bard Composix (Bard) [27];                                                                                                                     | PP mesh + ePTFE | Percentage of adhesion-area [7] (rat), [27] (rabbit), [38] (rat);                      |
| Rabbit  |                                      | Prolene (Marlex) VS Bard Composix (Bard) [7];<br>Bard Mesh (Bard) VS Bard Composix (Bard) [38];<br>Prolene (Ethicon) VS Prolene (Ethicon) + ePTFE (Gore-Tex) [28] |                 | Scale score of adhesion [38] (rat);<br>Adhesion-area [28] (rabbit)                     |
| Rat     | 3 weeks                              | Parietene (Sofradim) VS Bard Composix E/X (Bard)                                                                                                                  | PP mesh + ePTFE | Rate of adhesion presence [11];<br>Percentage of adhesion-area [11]                    |
| Rabbit  | 4 weeks                              | PP mesh (Davol) VS Bard Composix (Davol)                                                                                                                          | PP mesh + ePTFE | Extent score of adhesion [14]                                                          |
| Rabbit  | 4 weeks                              | PP mesh (Davol) VS Bard Composix (Davol)                                                                                                                          | No preference   | Percentage of adhesion-area [14];<br>Adhesion presence rate [14]                       |
| Rat     | 2 months                             | Prolene (Ethicon) VS Bard Composix (Bard)                                                                                                                         | No preference   | Percentage of adhesion-area [22];<br>Adhesion score composed of type and tenacity [22] |
| Rat     | 2 months                             | Prolene (Ethicon) VS Bard Composix (Bard)                                                                                                                         | PP mesh + ePTFE | Number of rats with adhesion score 3-4 [22];                                           |
| Rabbit  | 120 days                             | ProLite Ultra VS Bard Composix (Bard)                                                                                                                             | No preference   | Tenacity score of adhesion [25];<br>Percentage of adhesion-area [25]                   |
| Rabbit  | 1 year                               | PP mesh (Marlex) VS Bard Composix (Bard)                                                                                                                          | PP mesh + ePTFE | Percentage of adhesion-area [42]                                                       |



Table 10 The comparison between PP mesh and C-Qur mesh (PP mesh VS C-QUR mesh)

| Species | Follow-up | Comparison                             | Best mesh     | Measurements and reference                                                                     |
|---------|-----------|----------------------------------------|---------------|------------------------------------------------------------------------------------------------|
|         |           | (PP mesh VS C-QUR mesh)                |               |                                                                                                |
| Rat     | 7 days    | Prolene (Ethicon) VS C-Qur (Atrium)    | C-Qur mesh    | Percentage of adhesion-area [26];<br>Adhesion score composed of extent, type and tenacity [26] |
| Rat     | 30 days   | Prolene (Ethicon) VS C-Qur (Atrium)    | C-Qur mesh    | Percentage of adhesion-area [26];<br>Adhesion score composed of extent, type and tenacity [26] |
| Rat     | 90 days   | Parietene (Covidien) VS C-Qur (Atrium) | C-Qur mesh    | Percentage of adhesion-area [24];<br>Adhesion score composed of extent, type and tenacity [24] |
| Rabbit  | 120 days  | ProLite Ultra VS C-Qur (Atrium)        | No preference | Tenacity score of adhesion [25];<br>Percentage of adhesion-area [25]                           |

Table 11 The comparison between PP mesh coated by collagen (Parietene Composite mesh) VS other meshes with coatings

| Species | Follow-up | Comparison                                                                                                                                                                                                                                                              | Best mesh          | Measurements and reference                                                                     |
|---------|-----------|-------------------------------------------------------------------------------------------------------------------------------------------------------------------------------------------------------------------------------------------------------------------------|--------------------|------------------------------------------------------------------------------------------------|
| Rat     | 3 weeks   | Parietene (Sofradim) VS Parietex Composite (Sofradim)                                                                                                                                                                                                                   | PP mesh + collagen | Rate of adhesion presence [11];<br>Percentage of adhesion-area [11]                            |
| Rat     | 3 weeks   | Parietene Composite (Sofradim) VS Parietex Composite (Sofradim)<br><br>Parietene Composite (Sofradim) VS Bard Composix E/X (Davol)                                                                                                                                      | No preference      | Rate of adhesion presence [11];<br>Percentage of adhesion-area [11]                            |
| Rat     | 2 months  | Parietene Composite (Sofradim) VS PP mesh + Hyalobarrier gel<br><br>Parietene Composite (Sofradim) VS PP mesh + Tissucol (Baxter Healthcare)<br><br>Parietene Composite (Sofradim) VS Bard Composix (Bard)<br><br>Parietene Composite (Sofradim) VS Sepramesh (Genzyme) | No preference      | Percentage of adhesion-area [22];<br>Adhesion score composed of type and tenacity [22]         |
| Rat     | 3 months  | Parietene Composite (Covidien) VS Parietex Composite (Covidien)<br><br>Parietene Composite (Covidien) VS C-Qur (Atrium)<br><br>Parietene Composite (Covidien) VS Sepramesh IP (Bard)                                                                                    | No preference      | Percentage of adhesion-area [24];<br>Adhesion score composed of extent, type and tenacity [24] |
| Pig     | 4 months  | Parietene Composite (Covidien) VS Dynamesh IPOM (GmbH);<br><br>Parietene Composite (Covidien) VS Proceed (Ethicon)                                                                                                                                                      | PP mesh + collagen | Percentage of adhesion-area [47]                                                               |

Table 12 The comparison between PP mesh coated by HA/CMC (Sepramesh) and other kinds of meshes with coatings

| Species | Follow-up                | Comparison                                                                                                                                                                                                                                                                                  | Best mesh                 | Measurements and reference                                                                                                                                                                                                               |
|---------|--------------------------|---------------------------------------------------------------------------------------------------------------------------------------------------------------------------------------------------------------------------------------------------------------------------------------------|---------------------------|------------------------------------------------------------------------------------------------------------------------------------------------------------------------------------------------------------------------------------------|
| Rat     | 1 week, 4 weeks together | PP mesh + Interceed TC7 (Johnson & Johnson) VS PP mesh + CMC                                                                                                                                                                                                                                | No preference             | Extent score of adhesion [1]                                                                                                                                                                                                             |
| Rabbit  | 3 days                   | Sepramesh (Genzyme) VS Parietex Composite (Sofradim)<br>Sepramesh (Genzyme) VS PP mesh + polyurethane                                                                                                                                                                                       | PP mesh + HA/CMC          | Percentage of mesh adhesion-area [48]                                                                                                                                                                                                    |
| Rabbit  | 3 days                   | Sepramesh (Bard) VS Parietex Composite (Covidien)                                                                                                                                                                                                                                           | Polyester mesh + collagen | Rate of adhesion presence [49]                                                                                                                                                                                                           |
| Rabbit  | 3 days                   | Sepramesh (Bard) VS Proceed (Ethicon)                                                                                                                                                                                                                                                       | No preference             | Rate of adhesion presence [49]                                                                                                                                                                                                           |
| Rat     | 1 week                   | Sepramesh (Bard) VS Parietex Composite (Covidien) [50];                                                                                                                                                                                                                                     | No preference             | Percentage of adhesion-area [5] (rat);                                                                                                                                                                                                   |
| Rabbit  |                          | Sepramesh (Genzyme) VS Parietex Composite (Sofradim) [5];<br>Sepramesh (Bard) VS Physiomes (Ethicon) [50];<br>Sepramesh (Genzyme) VS DualMesh (GORE-TEX) [51];<br>Sepramesh (Bard) VS Proceed (Ethicon) [49]                                                                                |                           | Numbers of rats with bowel adhesion [5];<br>Adhesion score composed of width, thickness, subjective strength and amount of adhesion [50] (rabbit);<br>Extent score of adhesion [51] (rabbit);<br>Rate of adhesion presence [49] (rabbit) |
| Rat     | 1 week                   | Sepramesh (Genzyme) VS Ultrapro (Ethicon) [4];                                                                                                                                                                                                                                              | PP mesh + HA/CMC          | Percentage of adhesion-area [48] rabbit);                                                                                                                                                                                                |
| Rabbit  |                          | Sepramesh (Genzyme) VS Timesh (GfE Medizintechnik GmbH) [4];<br>Sepramesh (Bard) VS Bard Composix (Bard) [50];<br>Sepramesh (Bard) VS Proceed (Johnson & Johnson) [50];<br>Sepramesh (Genzyme) VS Parietex Composite (Sofradim) [48];<br>Sepramesh (Genzyme) VS PP mesh + polyurethane [48] |                           | Adhesion score composed of width, thickness, subjective strength and amount of adhesion [50](rabbit)                                                                                                                                     |
| Rabbit  | 1 week                   | Sepramesh (Bard) VS Parietex composite (Covidien)                                                                                                                                                                                                                                           | Polyester mesh + collagen | Rate of adhesion presence [49]                                                                                                                                                                                                           |
| Rat     | 2 weeks                  | PP mesh + Seprafilm (Genzyme) VS Composix (Bard) [7];                                                                                                                                                                                                                                       | No preference             | Percentage of adhesion-area [7];                                                                                                                                                                                                         |
| Rabbit  |                          | Sepramesh (Bard) VS Proceed (Ethicon) [49];<br>Sepramesh (Genzyme) VS Marlex (Bard) + Vicryl [9]                                                                                                                                                                                            |                           | Percentage of adhesion-area [9];<br>Adhesion score composed of type and tenacity [9];<br>Rate of adhesion presence [49]                                                                                                                  |
| Rabbit  | 2 weeks                  | Sepramesh (Genzyme) VS Parietex Composite (Sofradim);<br>Sepramesh (Genzyme) VS PP mesh + polyurethane                                                                                                                                                                                      | PP mesh + HA/CMC          | Percentage of mesh adhesion-area [48]                                                                                                                                                                                                    |
| Rabbit  | 2 weeks                  | Sepramesh (Bard) VS Parietex Composite (Covidien)                                                                                                                                                                                                                                           | Polyester mesh + collagen | Rate of adhesion presence [49]                                                                                                                                                                                                           |
| Rat     | 3 weeks                  | Sepramesh (Genzyme) VS Parietex Composite (Sofradim)                                                                                                                                                                                                                                        | Polyester mesh + collagen | Rate of adhesion presence [11];<br>Percentage of adhesion-area [11]                                                                                                                                                                      |
| Rat     | 3 weeks                  | Sepramesh (Genzyme) VS Parietex Composite (Sofradim)                                                                                                                                                                                                                                        | PP mesh + collagen        | Rate of adhesion presence [11];<br>Percentage of adhesion-area [11]                                                                                                                                                                      |
| Rat     | 3 weeks                  | Sepramesh (Genzyme) VS Bard Composix E/X (Davol) [11];<br>Sepramesh (Genzyme) VS Bard Composix (Bard) [51]                                                                                                                                                                                  | No preference             | Rate of adhesion presence [11];<br>Extent score of adhesion [51]                                                                                                                                                                         |
| Rat     | 3 weeks                  | Sepramesh (Genzyme) VS Bard Composix E/X (Davol) [11]                                                                                                                                                                                                                                       | PP mesh + ePTFE           | Percentage of adhesion-area [11]                                                                                                                                                                                                         |
| Rat     | 4 weeks                  | Sepramesh (Genzyme) VS Parietex composite (Sofradim)                                                                                                                                                                                                                                        | PP mesh + HA/CMC          | Percentage of adhesion-area [14] (rabbit), [5] (rat);                                                                                                                                                                                    |
| Rabbit  |                          | [5];                                                                                                                                                                                                                                                                                        |                           | Breaking strength of graft-organ adhesions[18] (rat);                                                                                                                                                                                    |

|        |          |                                                                              |                           |                                                                                                                                                                                          |
|--------|----------|------------------------------------------------------------------------------|---------------------------|------------------------------------------------------------------------------------------------------------------------------------------------------------------------------------------|
|        |          | Sepramesh (Genzyme) VS Vypro II (Johnson & Johnson)                          |                           | Adhesion presence rate [14] (rabbit)                                                                                                                                                     |
|        |          | [18];                                                                        |                           |                                                                                                                                                                                          |
|        |          | Sepramesh (Genzyme) VS Bard Composix mesh (Davol)                            |                           |                                                                                                                                                                                          |
|        |          | [14]                                                                         |                           |                                                                                                                                                                                          |
| Rabbit | 4 weeks  | Sepramesh (Genzyme) VS Parietex Composite (Sofradim)                         | Polyester mesh + collagen | Rate of bowel adhesion presence [52];<br>Adhesion-area [52]                                                                                                                              |
|        |          | [52]                                                                         |                           |                                                                                                                                                                                          |
| Rat    | 4 weeks  | Sepramesh (Genzyme) VS Parietex Composite (Sofradim)                         | No preference             | Percentage of adhesion-area[4] (rat), [53] (pig), [52] (rabbit);                                                                                                                         |
| Rabbit |          | [4,52,18];                                                                   |                           | Extent score of adhesion [17] (rat);                                                                                                                                                     |
| Pig    |          | Sepramesh (Genzyme) VS Proceed (Ethicon) [4];                                |                           | Tenacity score of adhesion [53] (pig), [16,17] (rat);                                                                                                                                    |
|        |          | Sepramesh (Genzyme) VS PP mesh + Interceed (Johnson & Johnson) [17];         |                           | Breaking strength of graft-omentum adhesions [18] (rat);                                                                                                                                 |
|        |          | Sepramesh (Bard) VS Proceed (Ethicon) [53];                                  |                           | Breaking strength of graft-organ adhesions [18] (rat);                                                                                                                                   |
|        |          | Sepramesh (Genzyme) VS Vypro II (Johnson & Johnson)                          |                           | Adhesion-area [54] (rat);                                                                                                                                                                |
|        |          | [18];                                                                        |                           | Adhesion score composed of density and scale [55] (rat)                                                                                                                                  |
|        |          | PP mesh + Seprafilm (Genzyme) VS PP mesh + SurgiWrap (Mast Biosurgery) [54]; |                           |                                                                                                                                                                                          |
|        |          | Sepramesh (Genzyme) VS Proceed (Ethicon)[55];                                |                           |                                                                                                                                                                                          |
|        |          | Sepramesh (Genzyme) VS PP mesh +Spray Gel [16];                              |                           |                                                                                                                                                                                          |
|        |          | Sepramesh (Bard) VS Ventrion Hernia Patch (Bard)                             |                           |                                                                                                                                                                                          |
|        |          | [53]                                                                         |                           |                                                                                                                                                                                          |
| Rabbit | 9 weeks  | Sepramesh (Genzyme) VS Bard Composix (Bard)                                  | No Preference             | Extent score of adhesion [51]                                                                                                                                                            |
| Rat    | 3 months | Sepramesh (Genzyme) VS TiMesh (GfE Medizintechnik GmbH) [56];                | No preference             | Measurement1 (M1): Scale score of adhesion [56];<br>Measurement2 (M2): Percentage of adhesion-area [24];<br>Measurement3 (M3): Adhesion score composed of extent, type and tenacity [24] |
|        |          | Sepramesh (Genzyme) VS Vypro (Ethicon) [56];                                 |                           |                                                                                                                                                                                          |
|        |          | Sepramesh (Genzyme) VS DynaMesh IPOM (FEG Textiltechnik) [56];               |                           |                                                                                                                                                                                          |
|        |          | Sepramesh (Bard) VS Parietex Composite (Covidien) (M2)                       |                           |                                                                                                                                                                                          |
|        |          | [24];                                                                        |                           |                                                                                                                                                                                          |
|        |          | Sepramesh (Bard) VS Parietene Composite (Covidien) (M2,M3) [24];             |                           |                                                                                                                                                                                          |
|        |          | Sepramesh (Bard) VS C-Qur Edge (Atrium) (M2) [24];                           |                           |                                                                                                                                                                                          |
|        |          | Sepramesh (Bard) VS Intramesh T1 (Cousin) (M2) [24]                          |                           |                                                                                                                                                                                          |
| Rat    | 3 months | Sepramesh (Bard) VS Parietex Composite (Covidien)                            | PP mesh + HA/CMC          | Measurement2 (M2): Percentage of adhesion-area [24];<br>Measurement3 (M3): Adhesion score composed of extent, type and tenacity [24]                                                     |
|        |          | (M3);                                                                        |                           |                                                                                                                                                                                          |
|        |          | Sepramesh (Bard) VS C-Qur Edge (M3);                                         |                           |                                                                                                                                                                                          |
|        |          | Sepramesh (Bard) VS Intramesh T1 (M3);                                       |                           |                                                                                                                                                                                          |
| Rabbit | 4 months | Sepramesh (Bard) VS Proceed (Ethicon)                                        | PP mesh + HA/CMC          | Tenacity score of adhesion [25];<br>Percentage of adhesion-area [25]                                                                                                                     |
| Rabbit | 4 months | Sepramesh (Bard) VS Parietex Composite (Covidien) [25];                      | No preference             | Tenacity score of adhesion [25];                                                                                                                                                         |
|        |          | Sepramesh (Bard) VS Composix (Bard) [25];                                    |                           | Percentage of adhesion-area [25];                                                                                                                                                        |
|        |          | Sepramesh (Genzyme) VS Composix (Bard) [51];                                 |                           | Adhesion score of extent [51]                                                                                                                                                            |
|        |          | Sepramesh (Bard) VS C-Qur mesh (Atrium) [25]                                 |                           |                                                                                                                                                                                          |
| Rabbit | 5 months | Sepramesh (Genzyme) VS Parietex Composite (Sofradim)                         | No preference             | Percentage of adhesion-area [52]                                                                                                                                                         |
| Rabbit | 5 months | Sepramesh (Genzyme) VS Parietex Composite (Sofradim)                         | Polyester mesh + collagen | Rate of bowel adhesion presence [52];<br>Adhesion-area [52]                                                                                                                              |

Table 13 The comparison between polyester mesh + collagen (Parietex composite mesh) and other meshes with coatings

| Species | Follow-up | Comparisons and reference                                                                                                                                                                                                                                                                                                                                                                                                                                                                                                                                                                                                                                                 | Best mesh                 | Measurements and reference                                                                                                                                                                                                                                                              |
|---------|-----------|---------------------------------------------------------------------------------------------------------------------------------------------------------------------------------------------------------------------------------------------------------------------------------------------------------------------------------------------------------------------------------------------------------------------------------------------------------------------------------------------------------------------------------------------------------------------------------------------------------------------------------------------------------------------------|---------------------------|-----------------------------------------------------------------------------------------------------------------------------------------------------------------------------------------------------------------------------------------------------------------------------------------|
| Rabbit  | 3 days    | Parietex Composite (Sofradim) VS Sepramesh (Genzyme) [48];<br>Parietex Composite (Covidien) VS Sepramesh (Bard) [49];<br>Parietex Composite (Covidien) VS Proceed (Ethicon) [57,49]                                                                                                                                                                                                                                                                                                                                                                                                                                                                                       | Polyester mesh + collagen | Percentage of mesh adhesion-area [48,57];<br>Rate of adhesion presence [49]                                                                                                                                                                                                             |
| Rabbit  | 3 days    | Parietex Composite (Sofradim) VS PP mesh + PU [48];<br>Parietex Composite (Covidien) VS Ventralex ST Hernia Patch (Bard) [57]                                                                                                                                                                                                                                                                                                                                                                                                                                                                                                                                             | No preference             | Percentage of mesh adhesion-area [48,57]                                                                                                                                                                                                                                                |
| Rabbit  | 7 days    | Parietex Composite (Covidien) VS Proceed (Ethicon)[57,50,49];<br>Parietex Composite (Sofradim) VS Proceed (Ethicon) [4];<br>Parietex Composite (Sofradim) VS Ultrapro (Ethicon) [4];<br>Parietex Composite (Sofradim) VS Timesh (GFE) [4];<br>Parietex Composite (Sofradim) VS Sepramesh (Genzyme) [48];<br>Parietex Composite (Covidien) VS Sepramesh (Bard) [49]                                                                                                                                                                                                                                                                                                        | Polyester mesh + collagen | Percentage of adhesion-area [4,57];<br>Rate of adhesion presence [49];<br>Percentage of mesh adhesion-area [48];<br>Adhesion score composed of width, thickness, subjective strength and amount of adhesion [50]                                                                        |
| Rabbit  | 7 days    | Parietex Composite (Covidien) VS Ventralex ST Hernia Patch (Bard) [57];<br>Parietex Composite (Sofradim) VS Sepramesh (Genzyme) [4];<br>Parietex Composite (Covidien) VS Bard Sepramesh Composite (Bard) [50];<br>Parietex Composite (Sofradim) VS Sepramesh (Genzyme) [5];<br>Parietex Composite (Sofradim) VS Timesh (GFE Medizintechnik) [26];<br>Parietex Composite (Sofradim) VS Proceed (Ethicon) [58,50,26];<br>Parietex Composite (Sofradim) VS Ultrapro (Ethicon) [26];<br>Parietex Composite (Sofradim) VS C-Qur (Atrium) [26];<br>Parietex Composite (Sofradim) VS PP mesh + PU [48];<br>Parietex Composite (Sofradim) VS PP mesh + polylactide composite [58] | No preference             | Percentage of adhesion-area [48,4,57,26,5];<br>Numbers of rats with bowel adhesion [5];<br>Adhesion score composed of extent, type and tenacity [26];<br>Adhesion score composed of width, thickness, subjective strength and amount of adhesion [50];<br>Extent score of adhesion [58] |
| Rat     | 10 days   | Parietex Composite VS PP mesh + Polydopamine                                                                                                                                                                                                                                                                                                                                                                                                                                                                                                                                                                                                                              | No preference             | Adhesion score composed of type, intensity and area [59]                                                                                                                                                                                                                                |
| Rabbit  | 2 weeks   | Proceed Ventral Patch (Ethicon) VS Ventralex ST Hernia Patch (Bard) [60,57];<br>Parietex Composite (Sofradim) VS Composix (Bard) [27];<br>Parietex Composite (Sofradim) VS Prolene (Ethicon) + ePTFE (Gore-Tex) [28];<br>Parietex Composite (Sofradim) VS PP mesh + polyurethane [48,27]                                                                                                                                                                                                                                                                                                                                                                                  | No preference             | Percentage of adhesion-area [48,60,57,27];<br>Adhesion-area [28]                                                                                                                                                                                                                        |

|        |          |                                                                                                                                                                                                                                                                                                                                                                                                                                                                                                                      |                                 |                                                                                                                                                                                                   |
|--------|----------|----------------------------------------------------------------------------------------------------------------------------------------------------------------------------------------------------------------------------------------------------------------------------------------------------------------------------------------------------------------------------------------------------------------------------------------------------------------------------------------------------------------------|---------------------------------|---------------------------------------------------------------------------------------------------------------------------------------------------------------------------------------------------|
| Rabbit | 2 weeks  | Parietex Composite (Sofradim) VS Sepramesh (Genzyme)                                                                                                                                                                                                                                                                                                                                                                                                                                                                 | Polyester mesh + collagen       | Percentage of mesh adhesion-area [48,62];                                                                                                                                                         |
| Pig    |          | [48];<br>Parietex Composite (Covidien) VS Sepramesh (Bard) [49];<br>Parietex Composite(Sofradim) VS Vypro (Ethicon) [61];<br>Parietex Composite Ventral Patch (Covidien) VS Proceed<br>Ventral Patch (Ethicon) [60,57];<br>Parietex Composite (Sofradim) VS Composix E/X (Bard)<br>[62]                                                                                                                                                                                                                              |                                 | Rate of adhesion presence [49];<br>Adhesion-area [61];<br>Percentage of adhesion-area [60,57];<br>Density score of adhesion [62]                                                                  |
| Rat    | 3 weeks  | Parietex Composite (Sofradim) VS Sepramesh (Genzyme)                                                                                                                                                                                                                                                                                                                                                                                                                                                                 | Polyester mesh + collagen       | Rate of adhesion presence [11];<br>Percentage of adhesion-area [11]                                                                                                                               |
| Rat    | 3 weeks  | Parietex Composite (Sofradim) VS Parietene Composite<br>(Sofradim);<br>Parietex Composite (Sofradim) VS Dual Mesh (Gore-Tex)                                                                                                                                                                                                                                                                                                                                                                                         | No preference                   | Rate of adhesion presence [11];<br>Percentage of adhesion-area [11]                                                                                                                               |
| Rat    | 4 weeks  | Parietex composite (Sofradim) VS Sepramesh (Genzyme)                                                                                                                                                                                                                                                                                                                                                                                                                                                                 | PP mesh + HA/CMC                | Percentage of adhesion-area [5]                                                                                                                                                                   |
| Pig    | 4 weeks  | Parietex Composite (Sofradim) VS Proceed (Ethicon)                                                                                                                                                                                                                                                                                                                                                                                                                                                                   | PP mesh + ORC                   | Percentage of adhesion-area [63]                                                                                                                                                                  |
| Rat    | 4 weeks  | Parietex Composite (Covidien) VS Ultrapro (Ethicon) [4];                                                                                                                                                                                                                                                                                                                                                                                                                                                             | Polyester mesh + collagen       | Percentage of adhesion-area [4] (rat);                                                                                                                                                            |
| Rabbit |          | Parietex Composite (Covidien) VS Timesh (GfE) [4];<br>Parietex Composite (Covidien) VS Proceed (Ethicon)<br>[4,26];<br>Parietex composite (Sofradim) VS Vypro II (Johnson &<br>Johnson) [18];<br>Parietex composite (Sofradim) VS Sepramesh (Genzyme)<br>[52];<br>Parietex Composite (Covidie) VS PP mesh + polylactide<br>composite[58]                                                                                                                                                                             |                                 | Breaking strength of graft–organ [18] (rat);<br>Rate of bowel adhesion presence [52] (rabbit);<br>Adhesion-area [52] (rabbit);<br>Adhesion score composed of extent, type and tenacity [26] (rat) |
| Rat    | 4 weeks  | Parietex Composite (Sofradim) VS Sepramesh (Genzyme)                                                                                                                                                                                                                                                                                                                                                                                                                                                                 | No preference                   | Percentage of adhesion-area [4] (rat), [63] (pig), [52] (rabbit), [26]                                                                                                                            |
| Rabbit |          | [52,18,4];                                                                                                                                                                                                                                                                                                                                                                                                                                                                                                           |                                 | (rat);                                                                                                                                                                                            |
| Pig    |          | Parietex Composite (Sofradim) VS Vypro II (Johnson &<br>Johnson) [18];<br>Parietex Composite (Sofradim) VS Timesh (GfE) [26];<br>Parietex Composite (Sofradim) VS Proceed (Ethicon) [26];<br>Parietex Composite (Sofradim) VS Ultrapro (Ethicon) [26];<br>Parietex Composite (Sofradim) VS C-Qur (Atrium) [26];<br>Parietex Composite (Sofradim) VS Composix E/X (Bard)<br>[63];<br>Parietex Composite (Covidien) VS Proceed (Ethicon) [58];<br>Parietex Composite (Covidien) VS PP mesh + polyglycolic<br>acid [64] |                                 | Breaking strength of graft–omentum [18] (rat);<br>Extent score of adhesion [58] (rabbit);<br>Number of bands of adhesions between viscera and abdominal<br>wall[64] (rabbit)                      |
| Rabbit | 6 weeks  | Parietex Composite Ventral Patch (Covidien) VS Proceed<br>Ventral Patch                                                                                                                                                                                                                                                                                                                                                                                                                                              | Polyester mesh + collagen       | Percentage of adhesion-area[[60,57]                                                                                                                                                               |
| Rabbit | 6 weeks  | Parietex Composite Ventral Patch (Covidien) VS<br>ST Hernia Patch (Bard)                                                                                                                                                                                                                                                                                                                                                                                                                                             | VentrexNo preference            | Percentage of adhesion-area [60,57]                                                                                                                                                               |
| Rat    | 2 months | Parietex Composite VS                                                                                                                                                                                                                                                                                                                                                                                                                                                                                                | PP mesh + polydopamine          | No preference                                                                                                                                                                                     |
| Pig    | 3 months | Parietex Composite VS                                                                                                                                                                                                                                                                                                                                                                                                                                                                                                | PP mesh + polyglycolic acid[64] | No preference                                                                                                                                                                                     |
| Rabbit |          | Parietex Composite (Covidien) VS Parietene Composite                                                                                                                                                                                                                                                                                                                                                                                                                                                                 |                                 | Adhesion score composed of type, intensity and area [59]<br>Number of bands of adhesions between viscera and abdominal wall<br>[64] (rabbit);                                                     |

|        |           |                                                                                                                                                                                                                                                                                                                                                                                                |  |                                                                                                                                                     |
|--------|-----------|------------------------------------------------------------------------------------------------------------------------------------------------------------------------------------------------------------------------------------------------------------------------------------------------------------------------------------------------------------------------------------------------|--|-----------------------------------------------------------------------------------------------------------------------------------------------------|
| Rat    |           | (Covidien) (M2,M3) [24];<br>Parietex Composite (Covidien) VS C-Qur Edge (Atrium) (M2,M3) [24];<br>Parietex Composite (Covidien) VS Sepramesh IP (Bard) (M3) [24];<br>Parietex Composite (Covidien) VS Intramesh T1 (Cousin) (M2,M3) [24]                                                                                                                                                       |  | Measurement 2 (M2): Percentage of adhesion-area[24](rat);<br>Measurement 3 (M3): Adhesion score composed of extent, type and tenacity [24] (rat)    |
| Sheep  | 3 months  | Parietex Composite (Covidien) VS DynaMesh-IPOM (Kebo) Polyester mesh + collagen                                                                                                                                                                                                                                                                                                                |  | Extent score of adhesion [65];<br>Tenacity score of adhesion [65]                                                                                   |
| Rat    | 3 months  | Parietex Composite (Covidien) VS Sepramesh IP (Bard) PP mesh + HA/CMC                                                                                                                                                                                                                                                                                                                          |  | Percentage of adhesion-area [24]                                                                                                                    |
| Rabbit | 4 months  | Parietex Composite (Covidien) VS Proceed (Ethicon) [58]; No preference<br>Parietex Composite (Covidien) VS PP mesh + polylactide composite [58];<br>Parietex Composite (Covidien) VS Proceed (Ethicon) [25];<br>Parietex Composite (Covidien) VS Sepramesh (Bard) [25];<br>Parietex Composite (Covidien) VS Composix (Bard) [25];<br>Parietex Composite (Covidien) VS C-Qur mesh (Atrium) [25] |  | Extent score of adhesion [58];<br>Tenacity score of adhesion [58];<br>Adhesion score of tenacity and type [25];<br>Percentage of adhesion-area [25] |
| Rabbit | 5 months  | Parietex composite (Sofradim) VS Sepramesh (Genzyme) Polyester mesh + collagen                                                                                                                                                                                                                                                                                                                 |  | Rate of bowel adhesion presence [52];<br>Adhesion-area [52]                                                                                         |
| Rabbit | 5 months  | Parietex composite (Sofradim) VS Sepramesh (Genzyme) No preference                                                                                                                                                                                                                                                                                                                             |  | Percentage of adhesion-area [52]                                                                                                                    |
| Sheep  | 6 months  | Parietex Composite (Covidien) VS DynaMesh-IPOM (Kebo) Polyester mesh + collagen                                                                                                                                                                                                                                                                                                                |  | Extent score of adhesion [65];                                                                                                                      |
| Rabbit |           | [65];<br>Parietex Composite Ventral Patch (Covidien) VS Proceed (Ethicon) [57]                                                                                                                                                                                                                                                                                                                 |  | Tenacity score of adhesion [65];<br>Percentage of adhesion-area [57]                                                                                |
| Rabbit | 6 months  | Parietex Composite Ventral Patch (Covidien) VS Ventrallex ST Hernia Patch (Bard) No preference                                                                                                                                                                                                                                                                                                 |  | Percentage of adhesion-area [57]                                                                                                                    |
| Sheep  | 12 months | Parietex Composite (Covidien) VS DynaMesh-IPOM (Kebo) Polyester mesh + collagen                                                                                                                                                                                                                                                                                                                |  | Extent score of adhesion [65];<br>Tenacity score of adhesion [65]                                                                                   |
| Sheep  | 18 months | Parietex Composite (Covidien) VS DynaMesh-IPOM (Kebo) Polyester mesh + collagen                                                                                                                                                                                                                                                                                                                |  | Extent score of adhesion [65];<br>Tenacity score of adhesion [65]                                                                                   |

## References

1. Alponat A, Lakshminarasappa SR, Teh M, Rajnakova A, Moochhala S, Goh PM, Chan ST (1997) Effects of physical barriers in prevention of adhesions: an incisional hernia model in rats. *The Journal of surgical research* 68 (2):126-132. doi:10.1006/jsre.1996.4979
2. Felemovicius I, Bonsack ME, Hagerman G, Delaney JP (2004) Prevention of adhesions to polypropylene mesh. *Journal of the American College of Surgeons* 198 (4):543-548. doi:10.1016/j.jamcollsurg.2003.12.004
3. Malazgirt Z, Ulusoy AN, Gok Y, Karagoz F, Tac K (2000) Bioabsorbable membrane prevents adhesions to polypropylene mesh in rats. *Hernia : the journal of hernias and abdominal wall surgery* 4 (3):129-133
4. Burger JW, Halm JA, Wijsmuller AR, ten Raa S, Jeekel J (2006) Evaluation of new prosthetic meshes for ventral hernia repair. *Surgical endoscopy* 20 (8):1320-1325. doi:10.1007/s00464-005-0706-4
5. van 't Riet M, de Vos van Steenwijk PJ, Bonthuis F, Marquet RL, Steyerberg EW, Jeekel J, Bonjer HJ (2003) Prevention of adhesion to prosthetic mesh: comparison of different barriers using an incisional hernia model. *Annals of surgery* 237 (1):123-128. doi:10.1097/01.sla.0000041264.79870.fc
6. Baptista ML, Bonsack ME, Delaney JP (2000) Seprafilm reduces adhesions to polypropylene mesh. *Surgery* 128 (1):86-92. doi:10.1067/msy.2000.106810
7. Besim H, Yalcin Y, Hamamci O, Arslan K, Sonisik M, Korkmaz A, Erdogan S (2002) Prevention of intraabdominal adhesions produced by polypropylene mesh. *European surgical research* *Europaische chirurgische Forschung Recherches chirurgicales europeennes* 34 (3):239-243. doi:10.1159/000063395
8. Ozmen MM, Aslar AK, Terzi MC, Albayrak L, Berberoglu M (2002) Prevention of adhesions by bioresorbable tissue barrier following laparoscopic intraabdominal mesh insertion. *Surgical Laparoscopy, Endoscopy and Percutaneous Techniques* 12 (5):342-346
9. Bellon JM, Garcia-Honduvilla N, Serrano N, Rodriguez M, Pascual G, Bujan J (2005) Composite prostheses for the repair of abdominal wall defects: effect of the structure of the adhesion barrier



component. *Hernia : the journal of hernias and abdominal wall surgery* 9 (4):338-343.

doi:10.1007/s10029-005-0012-z

10. Szabo A, Haj M, Waxman I, Eitan A (2000) Evaluation of seprafilm and amniotic membrane as adhesion prophylaxis in mesh repair of abdominal wall hernia in rats. *European surgical research Europäische chirurgische Forschung Recherches chirurgicales europeennes* 32 (2):125-128.

doi:10.1159/000008751

11. Gonzalez R, Rodeheaver GT, Moody DL, Foresman PA, Ramshaw BJ (2004) Resistance to adhesion formation: a comparative study of treated and untreated mesh products placed in the abdominal cavity. *Hernia : the journal of hernias and abdominal wall surgery* 8 (3):213-219.

doi:10.1007/s10029-004-0213-x

12. Borrazzo EC, Belmont MF, Boffa D, Fowler DL (2004) Effect of prosthetic material on adhesion formation after laparoscopic ventral hernia repair in a porcine model. *Hernia : the journal of hernias and abdominal wall surgery* 8 (2):108-112. doi:10.1007/s10029-003-0181-6

13. Mayagoitia-Gonzalez JC, Gudino-Amezcuca LM, Rivera-Barragan V, Mellado-Diaz AV, Diaz-Chavez EP (2012) Prevention of intestinal adhesions as a result of intraperitoneal mesh with the addition of hyaluronic acid/carboxymethylcellulose gel. Experimental model in rats. *Cir Cir* 80 (2):150-156

14. Greenawalt KE, Butler TJ, Rowe EA, Finneral AC, Garlick DS, Burns JW (2000) Evaluation of sepramesh biosurgical composite in a rabbit hernia repair model. *The Journal of surgical research* 94 (2):92-98. doi:10.1006/jsre.2000.6020

15. Dinsmore RC, Calton WC, Jr., Harvey SB, Blaney MW (2000) Prevention of adhesions to polypropylene mesh in a traumatized bowel model. *Journal of the American College of Surgeons* 191 (2):131-136

16. Dasiran F, Eryilmaz R, Isik A, Okan I, Somay A, Sahin M (2015) The effect of polyethylene glycol adhesion barrier (Spray Gel) on preventing peritoneal adhesions. *Bratislavske lekarske listy* 116 (6):379-382

17. Dilege E, Coskun H, Gunduz B, Sakiz D, Mihmanli M (2006) Prevention of adhesion to prosthetic mesh in incisional ventral hernias: comparison of different barriers in an experimental model. *European surgical research Europäische chirurgische Forschung Recherches chirurgicales europeennes* 38 (3):358-364. doi:10.1159/000094382
18. Kayaoglu HA, Ozkan N, Hazinedaroglu SM, Ersoy OF, Erkek AB, Koseoglu RD (2005) Comparison of adhesive properties of five different prosthetic materials used in hernioplasty. *Journal of investigative surgery : the official journal of the Academy of Surgical Research* 18 (2):89-95. doi:10.1080/08941930590926357
19. Yelimli B, Alponat A, Cubukcu A, Kuru M, Oz S, Ercin C, Gonullu N (2003) Carboxymethylcellulose coated on visceral face of polypropylene mesh prevents adhesion without impairing wound healing in incisional hernia model in rats. *Hernia : the journal of hernias and abdominal wall surgery* 7 (3):130-133. doi:10.1007/s10029-003-0125-1
20. Kramer K, Senninger N, Herbst H, Probst W (2002) Effective prevention of adhesions with hyaluronate. *Archives of surgery (Chicago, Ill : 1960)* 137 (3):278-282
21. Erpek H, Tuncyurek P, Soyder A, Boylu S (2006) Hyaluronic acid/carboxymethylcellulose membrane barrier versus taurolidine for the prevention of adhesions to polypropylene mesh. *European surgical research Europäische chirurgische Forschung Recherches chirurgicales europeennes* 38 (4):414-417. doi:10.1159/000094748
22. Sikkink CJ, Vries de Reilingh TS, Malyar AW, Jansen JA, Bleichrodt RP, van Goor H (2006) Adhesion formation and reherniation differ between meshes used for abdominal wall reconstruction. *Hernia : the journal of hernias and abdominal wall surgery* 10 (3):218-222. doi:10.1007/s10029-006-0065-7
23. Nohuz E, Alaboud M, Darcha C, Alloui A, Aublet-Cuvelier B, Jacquetin B (2014) Effectiveness of Hyalobarrier and Seprafilm to prevent polypropylene mesh shrinkage: a macroscopic and histological experimental study. *International urogynecology journal* 25 (8):1081-1087. doi:10.1007/s00192-014-2357-2

24. Schreinemacher MH, van Barneveld KW, Dikmans RE, Gijbels MJ, Greve JW, Bouvy ND (2013) Coated meshes for hernia repair provide comparable intraperitoneal adhesion prevention. *Surgical endoscopy* 27 (11):4202-4209. doi:10.1007/s00464-013-3021-5
25. Pierce RA, Perrone JM, Nimeri A, Sexton JA, Walcutt J, Frisella MM, Matthews BD (2009) 120-day comparative analysis of adhesion grade and quantity, mesh contraction, and tissue response to a novel omega-3 fatty acid bioabsorbable barrier macroporous mesh after intraperitoneal placement. *Surgical innovation* 16 (1):46-54. doi:10.1177/1553350608330479
26. Schreinemacher MH, Emans PJ, Gijbels MJ, Greve JW, Beets GL, Bouvy ND (2009) Degradation of mesh coatings and intraperitoneal adhesion formation in an experimental model. *The British journal of surgery* 96 (3):305-313
27. Bellon JM, Rodriguez M, Garcia-Honduvilla N, Pascual G, Gil VG, Bujan J (2007) Peritoneal effects of prosthetic meshes used to repair abdominal wall defects: monitoring adhesions by sequential laparoscopy. *Journal of Laparoendoscopic and Advanced Surgical Techniques* 17 (2):160-166
28. Bellon JM, Garcia-Carranza A, Jurado F, Garcia-Honduvilla N, Carrera-San Martin A, Bujan J (2001) Peritoneal regeneration after implant of a composite prosthesis in the abdominal wall. *World journal of surgery* 25 (2):147-152
29. Lamber B, Grossi JV, Manna BB, Montes JH, Bigolin AV, Cavazzola LT (2013) May polyester with collagen coating mesh decrease the rate of intraperitoneal adhesions in incisional hernia repair? *Arquivos brasileiros de cirurgia digestiva : ABCD = Brazilian archives of digestive surgery* 26 (1):13-17
30. Biondo-Simoes ML, Carvalho LB, Conceicao LT, Santos KB, Schiel WA, Arantes M, Silveira TD, Magri JC, Gomes FF (2017) Comparative study of Polypropylene versus Parietex composite(R), Vicryl(R) and Ultrapro(R) meshes, regarding the formation of intraperitoneal adhesions. *Acta cirurgica brasileira* 32 (2):98-107. doi:10.1590/s0102-865020170202
31. Voskerician G, Jin J, White MF, Williams CP, Rosen MJ (2010) Effect of biomaterial design criteria on the performance of surgical meshes for abdominal hernia repair: a pre-clinical evaluation in a

chronic rat model. *Journal of materials science Materials in medicine* 21 (6):1989-1995.

doi:10.1007/s10856-010-4037-1

32. Ditzel M, Deerenberg EB, Grotenhuis N, Harlaar JJ, Monkhorst K, Bastiaansen-Jenniskens YM, Jeekel J, Lange JF (2013) Biologic meshes are not superior to synthetic meshes in ventral hernia repair: an experimental study with long-term follow-up evaluation. *Surgical endoscopy* 27 (10):3654-3662. doi:10.1007/s00464-013-2939-y

33. van't Riet M, Burger JW, Bonthuis F, Jeekel J, Bonjer HJ (2004) Prevention of adhesion formation to polypropylene mesh by collagen coating: a randomized controlled study in a rat model of ventral hernia repair. *Surgical endoscopy* 18 (4):681-685. doi:10.1007/s00464-003-9054-4

34. Aliabadi-Wahle S, Choe EU, Jacob-LaBarre J, Flint LM, Ferrara JJ (1996) Evaluation of a novel synthetic material for closure of large abdominal wall defects. *Surgery* 119 (2):141-145

35. Bellon JM, Garcia-Carranza A, Jurado F, Garcia-Honduvilla N, Carrera-San Martin A, Bujan J (2002) Evaluation of a new composite prosthesis (PL-PU99) for the repair of abdominal wall defects in terms of behavior at the peritoneal interface. *World journal of surgery* 26 (6):661-666

36. Ansaloni L, Catena F, Coccolini F, Fini M, Gazzotti F, Giardino R, Pinna AD (2009) Peritoneal adhesions to prosthetic materials: an experimental comparative study of treated and untreated polypropylene meshes placed in the abdominal cavity. *Journal of laparoendoscopic & advanced surgical techniques Part A* 19 (3):369-374. doi:10.1089/lap.2008.0366

37. Emans PJ, Schreinemacher MH, Gijbels MJ, Beets GL, Greve JW, Koole LH, Bouvy ND (2009) Polypropylene meshes to prevent abdominal herniation. Can stable coatings prevent adhesions in the long term? *Annals of biomedical engineering* 37 (2):410-418. doi:10.1007/s10439-008-9608-7

38. Demir U, Mihmanli M, Coskun H, Dilege E, Kalyoncu A, Altinli E, Gunduz B, Yilmaz B (2005) Comparison of prosthetic materials in incisional hernia repair. *Surgery today* 35 (3):223-227. doi:10.1007/s00595-004-2907-1

39. Fitzgibbons Jr RJ, Salerno GM, Filipi CJ, Hunter WJ, Watson P (1994) A laparoscopic intraperitoneal onlay mesh technique for the repair of an indirect inguinal hernia. *Annals of surgery* 219 (2):144-156
40. Aramayo AL, Lopes Filho Gde J, Barbosa Cde A, Amaral Vda F, Costa LA (2013) Abdominal wall healing in incisional hernia using different biomaterials in rabbits. *Acta cirurgica brasileira* 28 (4):307-316
41. Rossi LF, Trindade MRM, AJ DA, Meurer L (2017) PERITONEAL ADHESIONS TYPE I, III AND TOTAL COLLAGEN ON POLYPROPYLENE AND COATED POLYPROPYLENE MESHES: EXPERIMENTAL STUDY IN RATS. *Arquivos brasileiros de cirurgia digestiva : ABCD = Brazilian archives of digestive surgery* 30 (2):77-82. doi:10.1590/0102-6720201700020001
42. Novitsky YW, Harrell AG, Cristiano JA, Paton BL, Norton HJ, Peindl RD, Kercher KW, Heniford BT (2007) Comparative evaluation of adhesion formation, strength of ingrowth, and textile properties of prosthetic meshes after long-term intra-abdominal implantation in a rabbit. *The Journal of surgical research* 140 (1):6-11. doi:10.1016/j.jss.2006.09.015
43. Bellon JM, Rodriguez M, Garcia-Honduvilla N, Gomez-Gil V, Pascual G, Bujan J (2008) Postimplant behavior of lightweight polypropylene meshes in an experimental model of abdominal hernia. *Journal of Investigative Surgery* 21 (5):280-287
44. de Vries Reilingh TS, van Goor H, Koppe MJ, Bodegom ME, Hendriks T, Bleichrodt RP (2007) Interposition of Polyglactin Mesh Does Not Prevent Adhesion Formation Between Viscera and Polypropylene Mesh. *Journal of Surgical Research* 140 (1):27-30
45. Goldenberg A, Matone J, Marcondes W, Herbella FA, Farah JF (2005) Comparative study of inflammatory response and adhesions formation after fixation of different meshes for inguinal hernia repair in rabbits. *Acta cirurgica brasileira / Sociedade Brasileira para Desenvolvimento Pesquisa em Cirurgia* 20 (5):347-352
46. Liu L, Petro C, Majumder A, Fayeziadeh M, Anderson J, Novitsky YW (2016) The use of Vicryl mesh in a porcine model to assess its safety as an adjunct to posterior fascial closure during

retromuscular mesh placement. *Hernia : the journal of hernias and abdominal wall surgery* 20 (2):289-295. doi:10.1007/s10029-016-1469-7

47. Schug-Pass C, Sommerer F, Tannapfel A, Lippert H, Kockerling F (2009) The use of composite meshes in laparoscopic repair of abdominal wall hernias: are there differences in biocompatibility?: experimental results obtained in a laparoscopic porcine model. *Surgical endoscopy* 23 (3):487-495. doi:10.1007/s00464-008-0085-8

48. Bellon JM, Rodriguez M, Garcia-Honduvilla N, Gomez-Gil V, Pascual G, Bujan J (2007) Real-time monitoring of the peritoneal behavior of composite prostheses by sequential laparoscopy: Applicability in ventral hernia repair. [Spanish] (Seguimiento del comportamiento peritoneal de diferentes biomateriales empleando laparoscopia secuencial. Aplicabilidad en la reparacion de hernias ventrales.). *Cirugia espanola* 82 (5):290-296

49. Rodriguez M, Pascual G, Sotomayor S, Perez-Koehler B, Cifuentes A, Bellon JM (2011) Chemical adhesion barriers: Do they affect the intraperitoneal behavior of a composite mesh? *Journal of Investigative Surgery* 24 (3):115-122

50. Konerding MA, Chantereau P, Delventhal V, Holste JL, Ackermann M (2012) Biomechanical and histological evaluation of abdominal wall compliance with intraperitoneal onlay mesh implants in rabbits: a comparison of six different state-of-the-art meshes. *Medical engineering & physics* 34 (7):806-816. doi:10.1016/j.medengphy.2011.09.022

51. Matthews BD, Mostafa G, Carbonell AM, Joels CS, Kercher KW, Austin C, Norton HJ, Heniford BT (2005) Evaluation of adhesion formation and host tissue response to intra-abdominal polytetrafluoroethylene mesh and composite prosthetic mesh. *Journal of Surgical Research* 123 (2):227-234

52. Johnson EK, Hoyt CH, Dinsmore RC (2004) Abdominal wall hernia repair: a long-term comparison of Sepramesh and Dualmesh in a rabbit hernia model. *The American surgeon* 70 (8):657-661

53. Deeken CR, Matthews BD (2011) Comparison of contracture, adhesion, tissue ingrowth, and histologic response characteristics of permanent and absorbable barrier meshes in a porcine model of laparoscopic ventral hernia repair. *Hernia : the journal of hernias and abdominal wall surgery*:1-8
54. Gruber-Blum S, Petter-Puchner AH, Brand J, Fortelny RH, Walder N, Oehlinger W, Koenig F, Redl H (2011) Comparison of three separate antiadhesive barriers for intraperitoneal onlay mesh hernia repair in an experimental model. *The British journal of surgery* 98 (3):442-449. doi:10.1002/bjs.7334
55. Leblebici IM, Bozkurt S, Sever B (2014) Comparison of adhesion-preventing meshes in a rat model of incisional hernia in terms of intra-abdominal adhesions and other complications. *Biomedical Research (India)* 25 (3):414-419
56. Celik A, Altinli E, Koksal N, Celik AS, Onur E, Ozkan OF, Gumrukcu G (2009) The shrinking rates of different meshes placed intraperitoneally: a long-term comparison of the TiMesh, VYPRO II, Sepramesh, and DynaMesh. *Surgical laparoscopy, endoscopy & percutaneous techniques* 19 (4):e130-134. doi:10.1097/SLE.0b013e3181aa598d
57. Garcia-Moreno F, Sotomayor S, Perez-Lopez P, Perez-Kohler B, Bayon Y, Pascual G, Bellon JM (2014) Intraperitoneal behaviour of a new composite mesh (Parietex Composite Ventral Patch) designed for umbilical or epigastric hernia repair. *Surgical endoscopy* 28 (12):3479-3488. doi:10.1007/s00464-014-3633-4
58. Dolce CJ, Keller JE, Stefanidis D, Walters KC, Heath JJ, Lincourt AL, Norton HJ, Kercher KW, Heniford BT (2012) Evaluation of soft tissue attachments to a novel intra-abdominal prosthetic in a rabbit model. *Surgical innovation* 19 (3):295-300. doi:10.1177/1553350611429115
59. Hu M, Lin X, Huang R, Yang K, Liang Y, Zhang X, Wang H, Wu D (2018) Lightweight, Highly Permeable, Biocompatible, and Antiadhesive Composite Meshes for Intraperitoneal Repairs. *Macromolecular bioscience* 18 (7):e1800067. doi:10.1002/mabi.201800067
60. Garcia-Moreno F, Perez-Lopez P, Sotomayor S, Perez-Kohler B, Bayon Y, Pascual G, Bellon JM (2015) Comparing the host tissue response and peritoneal behavior of composite meshes used for ventral hernia repair. *The Journal of surgical research* 193 (1):470-482. doi:10.1016/j.jss.2014.07.049

61. Bellon JM, Garcia-Honduvilla N, Jurado F, Garcia-Carranza A, Garcia-Moreno F, Martin AC, Bujan J (2001) Use of composite prostheses in the repair of defects in the abdominal wall: prosthetic behaviour at the peritoneum. *The European journal of surgery = Acta chirurgica* 167 (9):666-671. doi:10.1080/11024150152619291
62. Duffy AJ, Hogle NJ, LaPerle KM, Fowler DL (2004) Comparison of two composite meshes using two fixation devices in a porcine laparoscopic ventral hernia repair model. *Hernia : the journal of hernias and abdominal wall surgery* 8 (4):358-364. doi:10.1007/s10029-004-0258-x
63. Jacob BP, Hogle NJ, Durak E, Kim T, Fowler DL (2007) Tissue ingrowth and bowel adhesion formation in an animal comparative study: polypropylene versus Proceed versus Parietex Composite. *Surgical endoscopy* 21 (4):629-633. doi:10.1007/s00464-006-9157-9
64. de Araujo UR, Czezko NG, Ribas-Filho JM, Malafaia O, Budel VM, Balderrama CM, Zimmermann E, Dietz UA (2009) Intraperitoneal meshes in the repair of abdominal wall defects: comparison of polyester with collagen versus polypropylene with polyglycolic acid. *Revista do Colegio Brasileiro de Cirurgioes* 36 (3):241-249
65. Zinther NB, Wara P, Friis-Andersen H (2010) Intraperitoneal onlay mesh: an experimental study of adhesion formation in a sheep model. *Hernia : the journal of hernias and abdominal wall surgery* 14 (3):283-289. doi:10.1007/s10029-009-0622-y
